# Supplementary material
Source: MDPI journal article supplement (https://www.mdpi.com/2071-1050/9/7/1223)
Supplement: s1 [file s1]

**Table S1.** The full list of indicators, characterized issues, resolution of data, rules of characterization, and sources for the SLCA. The general descriptive data were adapted from the SHDB and the specific descriptive data were designed in this study.

| Stakeholders | Impact Categories            | Social Themes                                                                                | Characterized Issue                                                      | Data Indicators                                      | Types of Data (Quantitative, qualitative) | Resolution of Data | Rules for Characterization                                                                                                                 | Original Sources                    |
|--------------|------------------------------|----------------------------------------------------------------------------------------------|--------------------------------------------------------------------------|------------------------------------------------------|-------------------------------------------|--------------------|--------------------------------------------------------------------------------------------------------------------------------------------|-------------------------------------|
| Workers      | Labor rights and decent work | Child labor                                                                                  | Risk of child labor in country                                           | Percent total child labor in country                 | Quan                                      | Country            | <4% = low, 4–10% = med, 10–20% = high, >20% = very high                                                                                    | ILO, US Department of Labor, UNICEF |
|              |                              | Forced labor                                                                                 | Characterization of ILO's forced labor regional estimates                | Prevalence of forced labor by region                 | Quan                                      | Region to country  | <3 = low, 3–3.5 = medium, 3.5–4 = high, >4 = very high                                                                                     | ILO                                 |
|              |                              | Excessive working time<br>Freedom of association, collective bargaining, and right to strike | Risk of excessive working time by sector                                 | Percent of population working > 60 hours             | Quan, Qual                                | Sector             | <10% = low, 10–25% = medium, 25–50% = high, >50% = very high                                                                               | US Department of State              |
|              |                              |                                                                                              | Risk of a country lacks or does not enforce freedom of association       | Freedom of association rights                        | Qual                                      | Country            | Low = rights recognized, medium = allowed with minor restrictions, high = recognized but very limited, very high = no laws or laws against | ITUC                                |
|              |                              |                                                                                              | Risk of a country lacks or does not enforce collective bargaining rights | Collective bargaining rights                         | Qual                                      | Country            | Same as freedom of association rights.                                                                                                     | ITUC                                |
|              |                              |                                                                                              | Risk of a country lacks or does not enforce right to strike              | Right to strike                                      | Qual                                      | Country            | Same as freedom of association rights.                                                                                                     | ITUC                                |
|              | Health and safety            | Occupational injuries and deaths                                                             | Risk of fatal injuries by sector                                         | Fatal injury rate by sector, per 100,000 workers     | Quan                                      | Country to sector  | Low = <5, medium = 5–15, high = 15–20, very high = >20                                                                                     | Hamalainen et al. 2009              |
|              |                              |                                                                                              | Risk of non-fatal injuries by sector                                     | Non-fatal injury rate by sector, per 100,000 workers | Quan                                      | Country to sector  | Low = <5000, medium = 5000–15,000, high = 1500–25,000, very high = >25000                                                                  | Hamalainen et al. 2009              |
|              |                              | Occupational toxics and hazards                                                              | Risk of death by exposure to carcinogens                                 | Overall occupational cancer risk, deaths             | Quan                                      | Region to country  | Based on the average of lung cancer, Leukemia, and Mesothelioma                                                                            | Driscoll et al. 2005                |
|              |                              |                                                                                              | Risk of loss of life years by exposure to carcinogens                    | Overall occupational cancer risk, loss of life years | Quan                                      | Region to country  | Same as risk of death by exposure to carcinogens                                                                                           | Driscoll et al. 2005                |

|                 |                   |                     |                                                                   |                                                                         |      |         |                                                                                                                                                                    |                                                                   |
|-----------------|-------------------|---------------------|-------------------------------------------------------------------|-------------------------------------------------------------------------|------|---------|--------------------------------------------------------------------------------------------------------------------------------------------------------------------|-------------------------------------------------------------------|
|                 |                   |                     | Risk of workplace noise exposure                                  | Overall occupational noise exposure                                     | Quan | Region  | Low = <14, medium = 14–22, high = 22–22.5, very high = >22.5                                                                                                       | WHO                                                               |
|                 | Human rights      | Gender equality     | Risk of gender inequality in country                              | Overall gender inequity in country                                      | Quan | Country | Based on the average of SIGI, Global Gender Gap Index, and GII                                                                                                     | UNDP, SIGI, CIRI, World Bank                                      |
| Local community | Health and safety | Exposure to NORMs   | Risk of exposure to U-238                                         | U-238 series in P ore                                                   | Quan | Country | Low = <500, medium = 500–1000, high = 1000–2000, very high = >2000                                                                                                 | NIRS                                                              |
|                 |                   |                     | Risk of exposure to radioactive Th-232                            | Th-232 series in P ore                                                  | Quan | Country | Low = <500, medium = 500–1000, high = 1000–2000, very high = >2000                                                                                                 | NIRS                                                              |
|                 |                   |                     | Risk of exposure to radioactive K-40                              | K-40 series in P ore                                                    | Quan | Country | Low = <2500, medium = 2500-5000, high = 5000-7500, very high = >7500                                                                                               | NIRS                                                              |
|                 | Human rights      | Indigenous rights   | Risk of indigenous people are negatively impact at sectoral level | Indigenous sector issues identified                                     | Qual | Country | Subjective judgement based on reported evidences                                                                                                                   | UNDESA                                                            |
|                 |                   |                     | Risk of indigenous people are negatively impact at P activity     | Indigenous P issues identified                                          | Qual | Country | Subjective judgement based on reported evidences                                                                                                                   | Cordell et al. 2015                                               |
|                 |                   | High conflict zones | Risk of high conflict                                             | Overall risk of high conflict                                           | Qual | Country | Based on the average of Heidelberg Conflict Barometer, State Fragility Index, UN Refugee Agency Global Trends Reports, and the Conflict without Borders assessment | Heidelberg Institute, UN Refugee Agency, Conflict without borders |
|                 | Governance        | Corruption          | Risk of corruption                                                | Overall risk of corruption                                              | Qual | Country | Based on the average of Worldwide Governance Indicators, World Economic Forum, and Transparency International                                                      | Transparency International, World Economic Forum                  |
| Farmer          | Livelihood        | Income              | Risk of unaffordable of P fertilizers                             | Ratio of income spending on P fertilizer                                | Quan | Country | Expert judgement                                                                                                                                                   | Japan Agricultural Statistics                                     |
|                 |                   |                     | Risk of overpriced of P fertilizers                               | Farm gate price of P fertilizers relative to international market price |      |         | Expert judgement                                                                                                                                                   | IFA                                                               |
| Society         | P Security        | P import dependency | Dependency of foreign P                                           | Ratio of import P and total P consumption                               | Quan | Country | Expert judgement                                                                                                                                                   | Japan Agricultural Statistics                                     |

|                                     |                              |                                                     |                                                                       |      |         |                  |                               |
|-------------------------------------|------------------------------|-----------------------------------------------------|-----------------------------------------------------------------------|------|---------|------------------|-------------------------------|
| Commitment to Sustainability issues | Mineral P depletion          | Risk of over consumption of P fertilizer            | Mineral P consumption relative to global consumption, in per ha input | Quan | Country | Expert judgement | Japan Agricultural Statistics |
|                                     | Education and responsibility | Risk of hindering the promotion of circular society | Effort in promoting recycling                                         | Qual | Country | Expert judgement | Interview                     |

---

\* ILO: International Labour Organization, UNICEF: The United Nations Children's Fund, ITUC: International Trade Union Confederation, UNDP: United Nations Development Programme, WHO: World Health Organization, SIGI: Social Institutions and Gender Index, CIRI: The CIRI Human Rights Data Project, NIRS: National Institute of Radiological Sciences, Japan, UNDESA: The United Nations Department of Economic and Social Affairs, IFA: International Fertilizer Industry Associatio.
